# Supplementary material for: Breast tumors interfere with endothelial TRAIL at the premetastatic niche to promote cancer cell seeding
Source: PubMed Central journal article supplement — Sci Adv. 2023 Mar 22;9(12):eadd5028. doi: 10.1126/sciadv.add5028 (PMC10032608; doi:10.1126/sciadv.add5028), 2023-03-22
Supplement: sciadv.add5028_sm.pdf [file sciadv.add5028_sm.pdf]

Supplementary Materials for

**Breast tumors interfere with endothelial TRAIL at the premetastatic niche to promote cancer cell seeding**

Carla Riera-Domingo *et al.*

Corresponding author: Massimiliano Mazzone, [massimiliano.mazzone@kuleuven.be](mailto:massimiliano.mazzone@kuleuven.be)

*Sci. Adv.* **9**, eadd5028 (2023)  
DOI: 10.1126/sciadv.add5028

**This PDF file includes:**

Figs. S1 to S11

Fig. S1

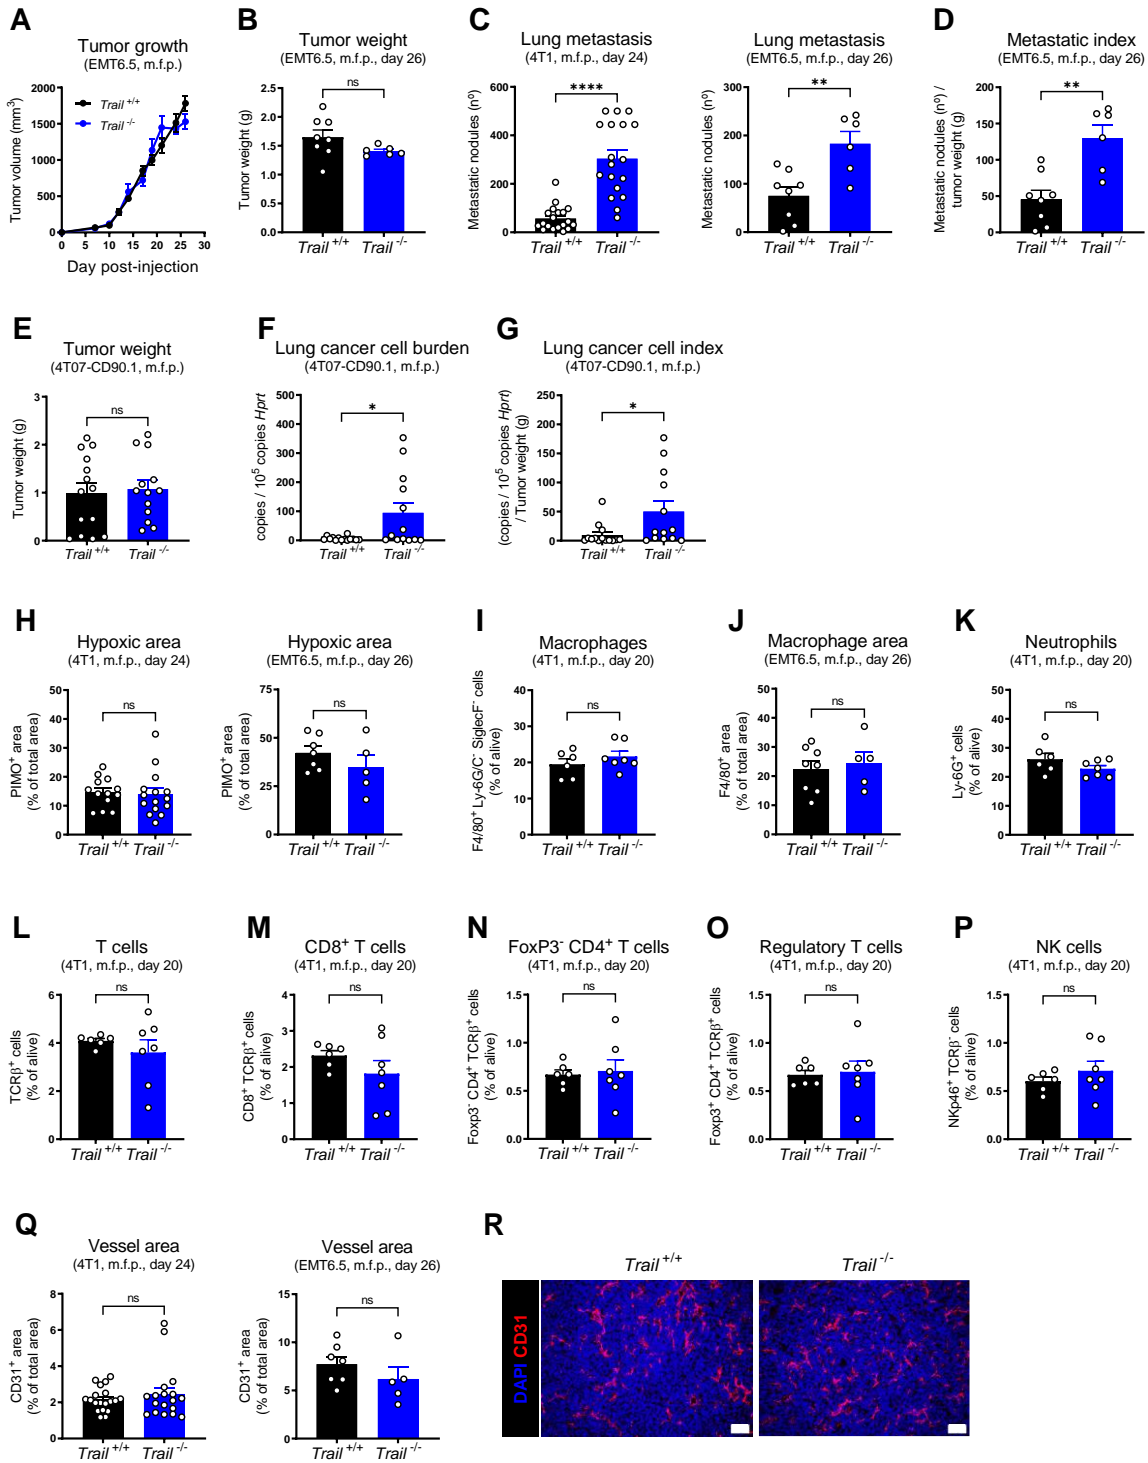

**Fig. S1. Related to Endogenous TRAIL restrains cancer cell colonization and metastasis independently of DR5 expression in cancer cells**

(A-D), Tumor growth (A), tumor weight (B), number of ink-contrasted lungs (C) and metastatic index (D) 24 days (4T1) or 26 days (EMT6.5) after orthotopic m.f.p. injection of 4T1 or EMT6.5 cells in constitutive TRAIL WT (*Trail*<sup>+/+</sup>) and KO (*Trail*<sup>-/-</sup>) mice.

(E), Tumor weight after orthotopic m.f.p. injection of 4T07-CD90.1 cells in *Trail*<sup>+/+</sup> and *Trail*<sup>-/-</sup> mice.

(F), mRNA expression of *dLNGFR* in perfused whole lung tissue after orthotopic m.f.p. injection of 4T07-CD90.1 cells in *Trail*<sup>+/+</sup> and *Trail*<sup>-/-</sup> mice.

(G), mRNA expression of *dLNGFR* normalized by tumor weight in perfused whole lung tissue after orthotopic m.f.p. injection of 4T07-CD90.1 cells in *Trail*<sup>+/+</sup> and *Trail*<sup>-/-</sup> mice.

(H), Histological analysis of PIMO<sup>+</sup> hypoxic area 24 days (4T1) or 26 days (EMT6.5) after orthotopic m.f.p. injection of 4T1 or EMT6.5 cells in *Trail*<sup>+/+</sup> and *Trail*<sup>-/-</sup> mice.

(I), FACS analysis of the percentage of tumor-infiltrating macrophages 20 days after orthotopic m.f.p. injection of 4T1 cells in *Trail*<sup>+/+</sup> and *Trail*<sup>-/-</sup> mice.

(J), Histological analysis of F4/80<sup>+</sup> macrophage area 26 days after orthotopic m.f.p. injection of EMT6.5 cells in *Trail*<sup>+/+</sup> and *Trail*<sup>-/-</sup> mice.

(K-P), FACS analysis of the percentage of tumor-infiltrating neutrophils (K), total T cells (L), CD8<sup>+</sup> T cells (M), Foxp3<sup>-</sup> CD4<sup>+</sup> T cells (N) Foxp3<sup>+</sup> CD4<sup>+</sup> regulatory T cells (O) and NK cells (P) 20 days after orthotopic m.f.p. injection of 4T1 cells in *Trail*<sup>+/+</sup> and *Trail*<sup>-/-</sup> mice.

(Q,R), Histological analysis of CD31<sup>+</sup> tumor vessel area 24 days (4T1) or 26 days (EMT6.5) after orthotopic m.f.p. injection of 4T1 or EMT6.5 cells in *Trail*<sup>+/+</sup> and *Trail*<sup>-/-</sup> mice. Scale bar = 50μm. Abbreviations: mammary fat pad (m.f.p.). All graphs show mean±SEM. ns=not significant;

\*\*p<0,01; \*\*\*\*p<0,0001.

Fig. S2

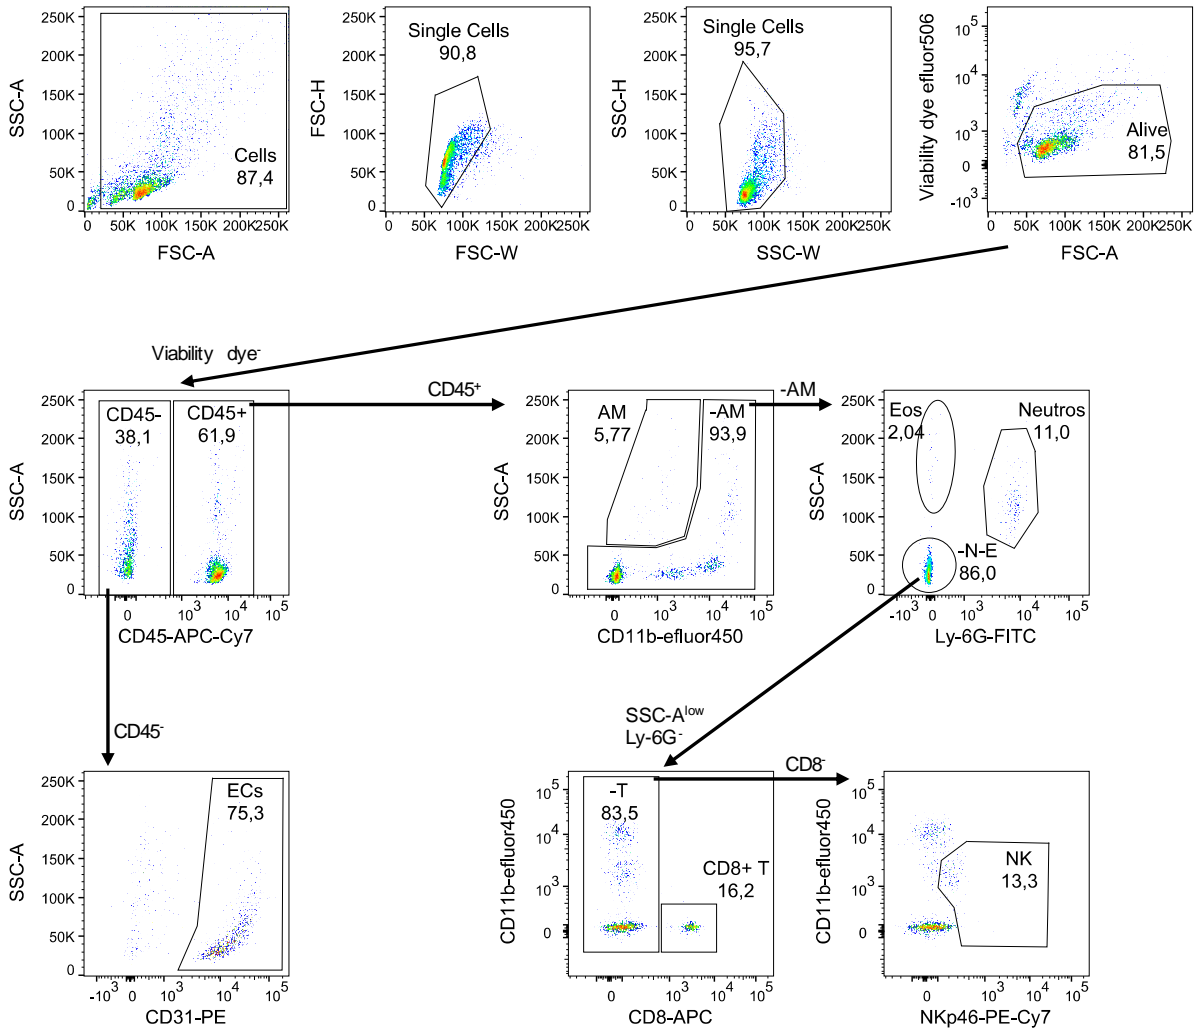

Fig. S2. Gating strategy for lung cell populations

Fig. S3

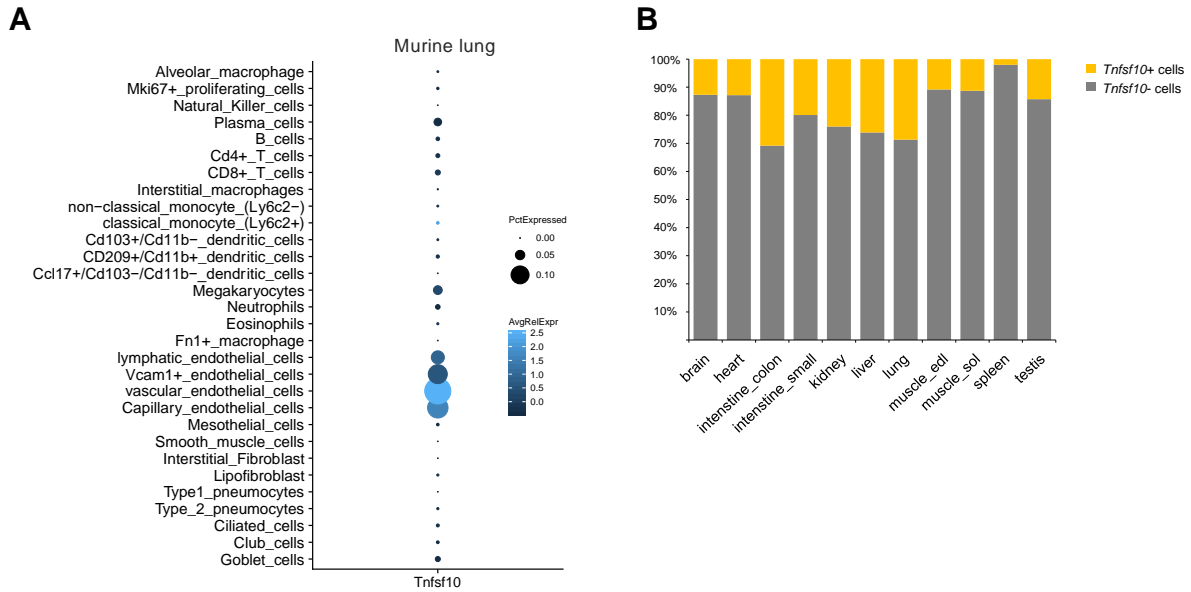

**Fig. S3. Related to ECs in the pre-metastatic lung (and liver) are the main source of TRAIL**  
**(A)**, Dotplot showing the percentage of cells expressing *Tnfsf10* using dot size and the average expression level of *Tnfsf10* based on unique molecular identifier (UMI) counts. Rows represent hierarchically clustered cell types, demonstrating similarities of transcriptional profiles.  
**(B)** Percentage of organ-specific cells expressing *Tnfsf10*.

Fig. S4

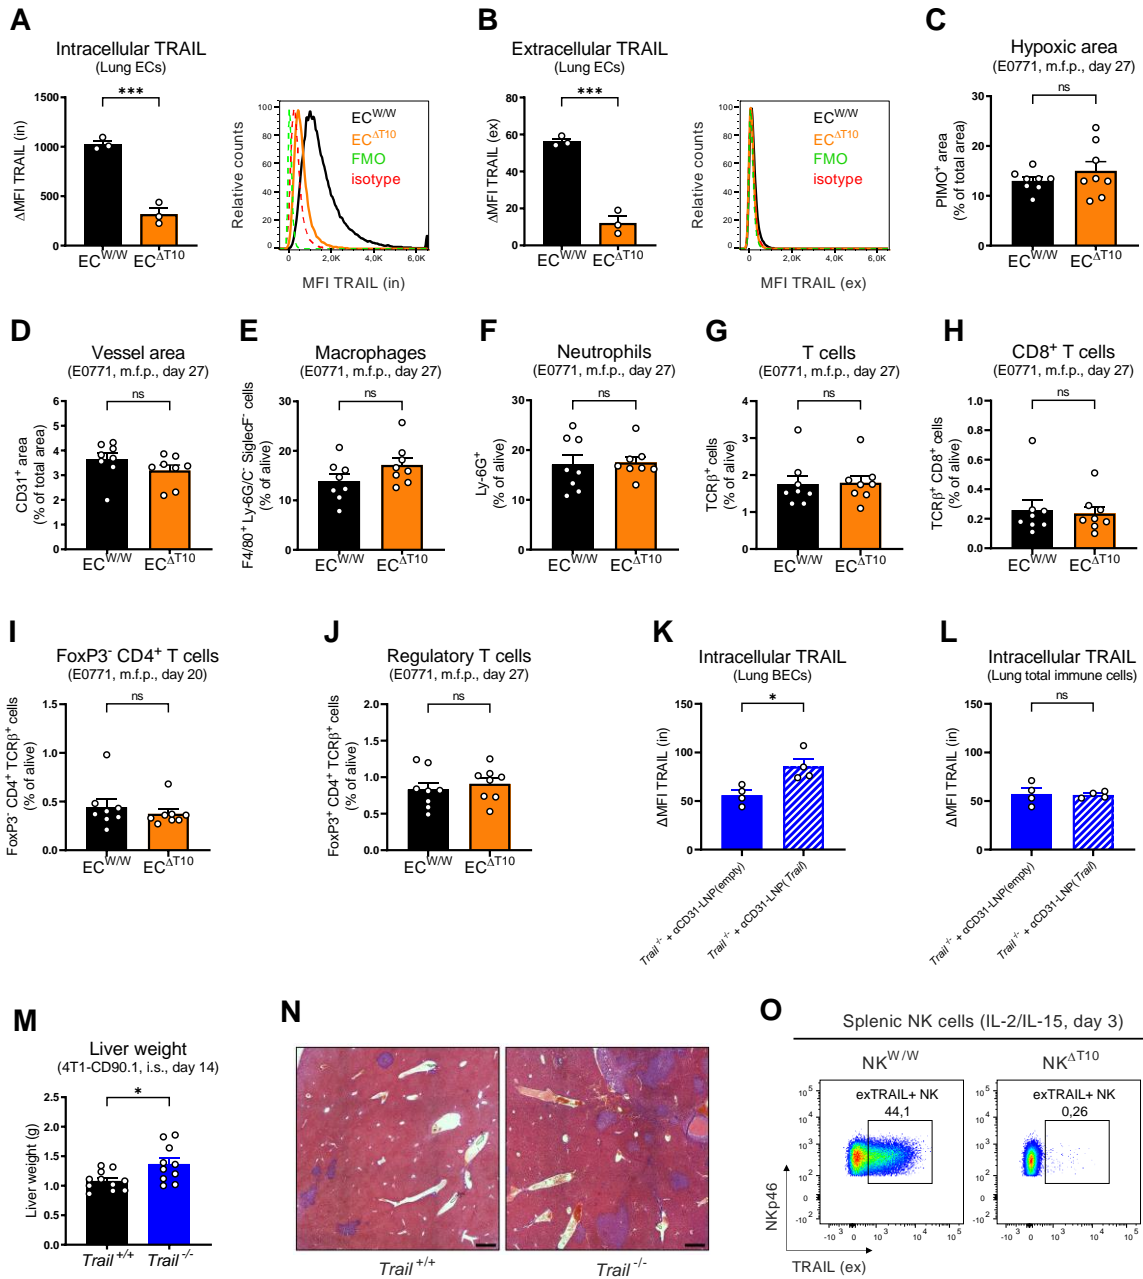

**Fig. S4. Related to EC-derived TRAIL at the pre-metastatic niche restrains early metastatic colonization**

(A,B), FACS analysis of intracellular (A) or extracellular (B) TRAIL protein on lung ECs from induced EC<sup>W/W</sup> and EC<sup>ΔT10</sup> mice.  $\Delta\text{MFI} = \text{MFI}_{\text{stained}} - \text{MFI}_{\text{isotype}}$  (A) or  $\Delta\text{MFI} = \text{MFI}_{\text{stained}} - \text{MFI}_{\text{FMO}}$  (B).

(C), Histological analysis of PIMO<sup>+</sup> hypoxic area 27 days after orthotopic m.f.p. injection of E0771 cells in induced EC<sup>W/W</sup> and EC<sup>ΔT10</sup> mice.

(D), Histological analysis of the CD31<sup>+</sup> tumor vessel area 27 days after orthotopic m.f.p. injection of E0771 cells in induced EC<sup>W/W</sup> and EC<sup>ΔT10</sup> mice.

(E-J), FACS analysis of the percentage of tumor-infiltrating macrophages (E), neutrophils (F), total T cells (G), CD8<sup>+</sup> T cells (H), Foxp3<sup>-</sup> CD4<sup>+</sup> T cells (I), and Foxp3<sup>+</sup> CD4<sup>+</sup> regulatory T cells (J) 27 days after orthotopic m.f.p. injection of E0771 cells in EC<sup>W/W</sup> and EC<sup>ΔT10</sup> mice.

(K,L), FACS analysis of intracellular TRAIL protein on lung BECs (K) or total CD45<sup>+</sup> immune cells (L) from *Trail*<sup>-/-</sup> mice. Anti-CD31-LNP/empty or anti-CD31-LNP/*Trail* (8μg/mouse) were injected i.v. 48h and 24h before sacrifice.  $\Delta\text{MFI} = \text{MFI}_{\text{stained}} - \text{MFI}_{\text{isotype}}$ .

(M), Liver weight 14 days after intrasplenic (i.s.) injection of 4T1-CD90.1 cells in *Trail*<sup>+/+</sup> and *Trail*<sup>-/-</sup> mice.

(N), Representative images of H&E staining of livers 14 days after intrasplenic (i.s.) injection of 4T1-CD90.1 cells in *Trail*<sup>+/+</sup> and *Trail*<sup>-/-</sup> mice. Scale bar = 500μm.

(O), FACS analysis of extracellular TRAIL protein in splenic NK cells from tumor-free NK<sup>W/W</sup> and NK<sup>ΔT10</sup> mice cultured *ex vivo* with of IL-2 and IL-15 (100ng/ml) for 3 days.

Abbreviations: median fluorescence intensity (MFI), fluorescence minus one control (FMO), mammary fat pad (m.f.p.), blood-vessel endothelial cells (BECs), intravenous (i.v.). All graphs show mean±SEM. ns=not significant; \*p<0,05; \*\*\*p<0,001.

Fig. S5

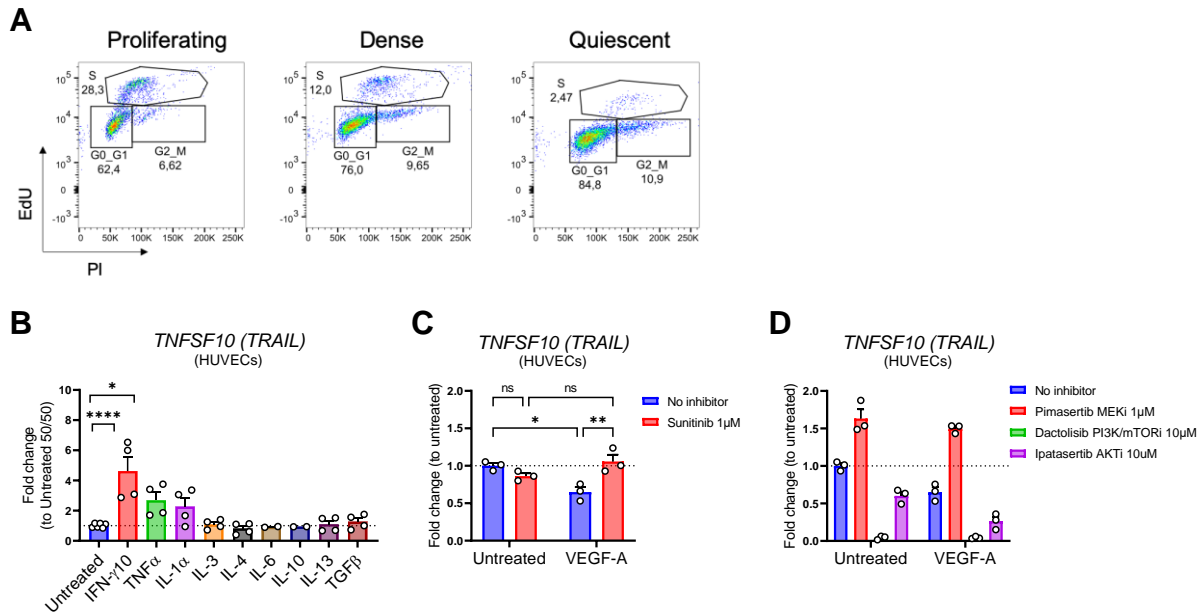

**Fig. S5. Related to TRAIL expression is a trait of endothelial cell quiescence**

(A), FACS analysis of the cell cycle showing the percentage of cells in G0/G1 phase (PI<sup>2n</sup> EdU<sup>-</sup>), S phase (EdU<sup>+</sup>) and G2/M phase (PI<sup>4n</sup> EdU<sup>-</sup>) in proliferating, dense and quiescent HUVECs. EdU was added for the final 5h of the culture.

(B), mRNA expression of *TNFSF10* in quiescent HUVECs treated with IFN- $\gamma$  (10ng/ml), TNF $\alpha$  (20ng/ml), IL-1 $\alpha$  (5ng/ml), IL-3 (20ng/ml), IL-4 (20ng/ml), IL-6 (20ng/ml), IL-10 (150ng/ml), IL-13 (25ng/ml) or TGF $\beta$  (20ng/ml) for 17h.

(C), mRNA expression of *TNFSF10* in quiescent HUVECs treated with VEGF-A (50ng/ml) and/or sunitinib (1 $\mu$ M) for 17h.

(D), mRNA expression of *TNFSF10* in quiescent HUVECs treated with VEGF-A (50ng/ml) and/or the MEK inhibitor Pimasertib (1 $\mu$ M), the PI3K/mTOR inhibitor Dactolisib (10 $\mu$ M) or the Akt inhibitor Ipatasertib (10 $\mu$ M) for 17h.

All graphs show mean $\pm$ SEM. ns=not significant; \*p<0,05; \*\*p<0,01; \*\*\*\*p<0,0001.



Fig. S6

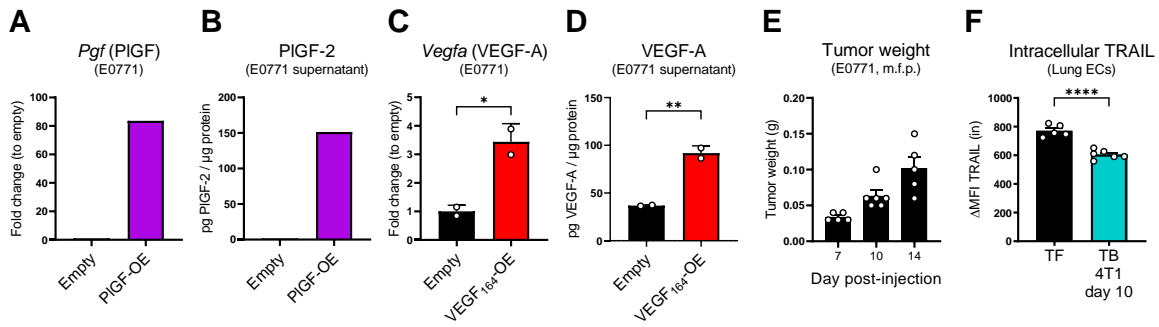

**Fig. S6. Related to TRAIL expression is downregulated by tumor-derived factors during pre-metastatic niche formation**

(A), mRNA expression of *Pgf* (PIGF) in PIGF-OE E0771 cells.

(B), Protein levels of PIGF-2 in the supernatant of PIGF-OE E0771 cells, normalized to total protein content.

(C), mRNA expression of *Vegfa* (VEGF-A) in VEGF-A<sub>164</sub>-OE E0771 cells.

(D), Protein levels of VEGF-A in the supernatant of VEGF-A<sub>164</sub>-OE E0771 cells, normalized to total protein content.

(E), Tumor weight after orthotopic m.f.p. injection of E0771-dLNGFR cells in WT mice.

(F), FACS analysis of intracellular TRAIL protein in lung ECs from tumor-free mice or 10 days after orthotopic m.f.p. injection of 4T1 cells in WT mice.

Abbreviations: overexpressing (OE). All graphs show mean $\pm$ SEM. ns=not significant; \*p<0,05; \*\*p<0,01; \*\*\*\*p<0,0001.

Fig. S7

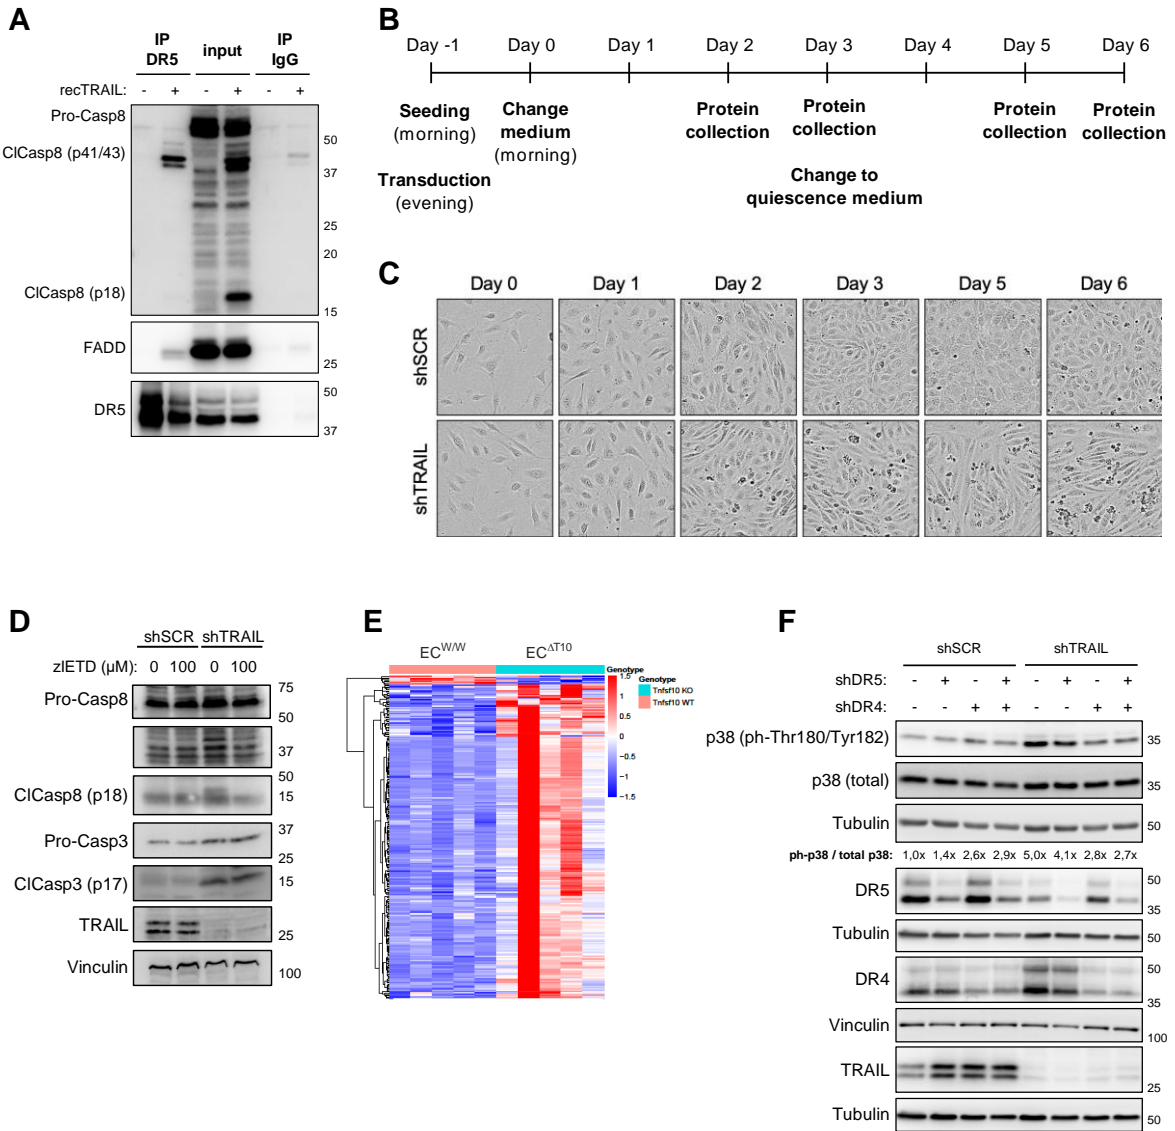

**Fig. S7. Related to EC-specific depletion of TRAIL triggers apoptosis**

(A), Co-immunoprecipitation of DR5 or IgG control in quiescent HUVECs treated with SuperKillerTRAIL (recTRAIL, 1µg/ml) for 30min, showing protein levels of pro-caspase-8, cleaved caspase-8 (clCasp8), FADD, and DR5. Input = whole cell extract.

(B), Global scheme of gene silencing experiments in HUVECs, showing the time points of protein collection for the time course analysis.

(C), Representative contrast-phase images in HUVECs silenced for TRAIL (shTRAIL) or its scrambled control (shSCR).

(D), Protein levels of pro-caspase-8, cleaved caspase-8 (clCasp8), pro-caspase-3, cleaved caspase-3 (clCasp3) and TRAIL in shSCR and shTRAIL HUVECs at day 3 treated with the caspase-8-specific inhibitor zIETD (100µM) since day 1.

(E), Heatmap of differentially expressed genes in sorted lung ECs from tumor-free induced EC<sup>W/W</sup> and EC<sup>ΔT10</sup> mice.

(F), Protein levels of p38 (total and ph-Thr180/Tyr182), DR5, DR4 and TRAIL in shSCR and shTRAIL HUVECs in which DR5, DR4, both or none, were silenced. For each condition, the densitometry fold change towards shSCR is indicated.

Fig. S8

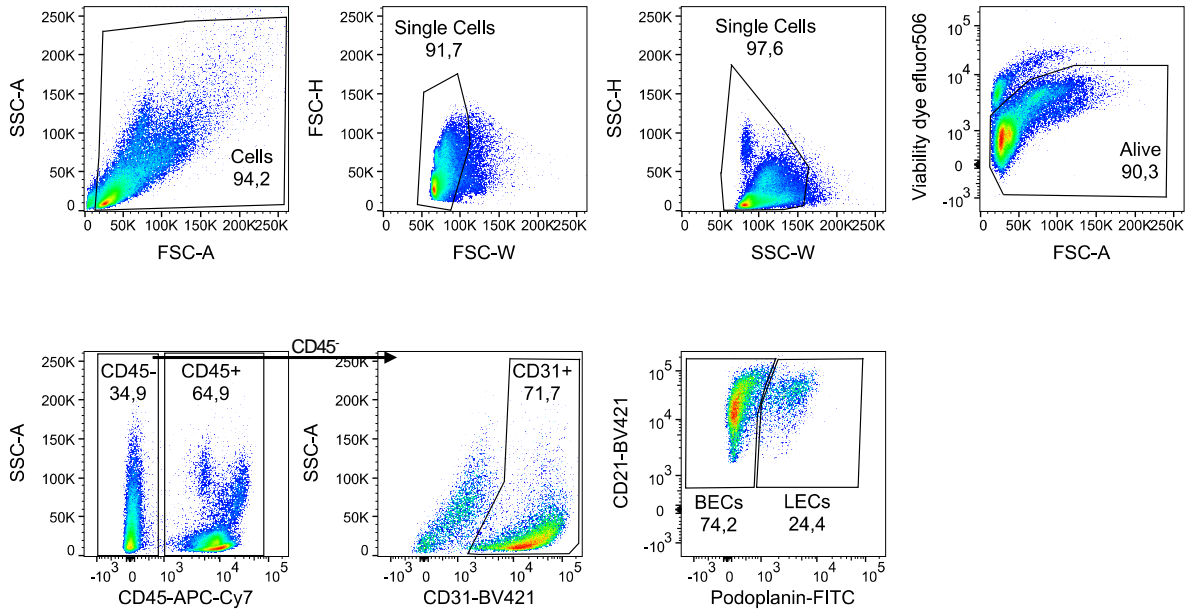

Fig. S8. Gating strategy for lung blood-vessel and lymphatic-vessel ECs (LECs)

Fig. S9

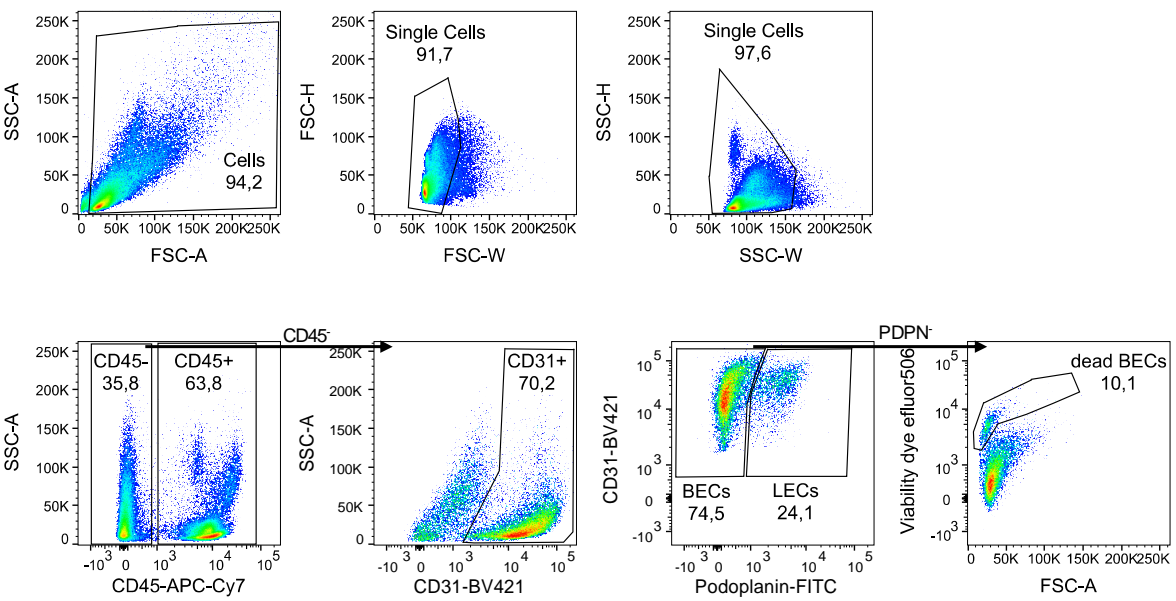

Fig. S9. Gating strategy for dead lung blood-vessel ECs (BECs)

Fig. S10

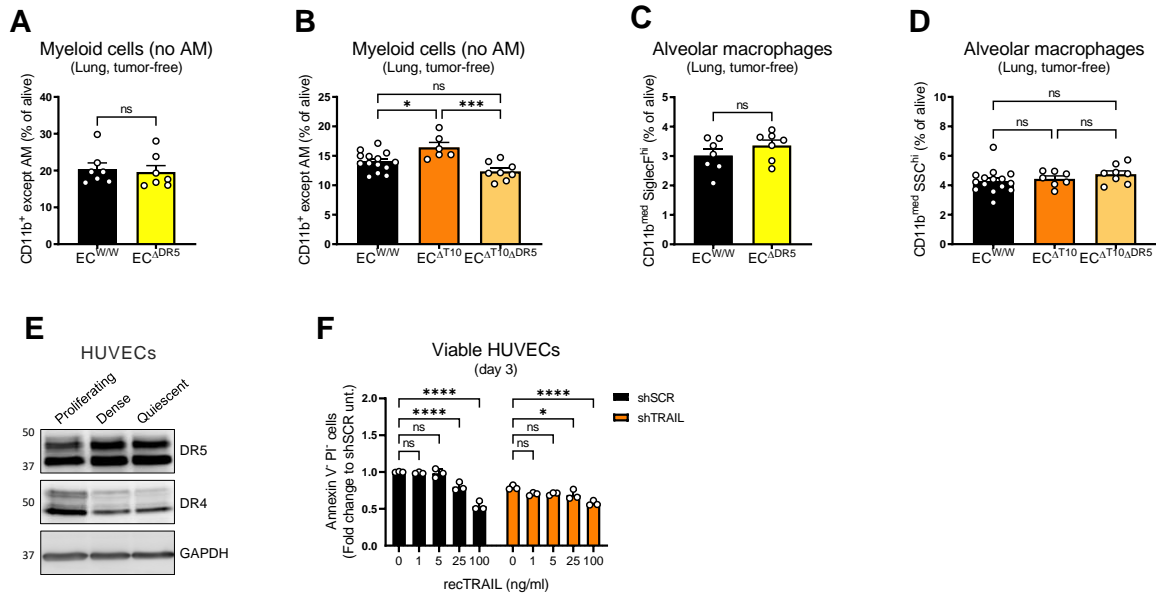

**Fig. S10. Related to Endothelial DR5 favors metastatic spread**

(A-D), FACS analysis of the percentage or number of myeloid cells excluding alveolar macrophages (AM) (A,B), and AM (C,D) in perfused lungs from tumor-free induced EC<sup>W/W</sup>, EC<sup>ADR5</sup> and EC<sup>AT10ADR5</sup> mice. **Fig. 7Q,U** previously showed dataset relative to EC<sup>AT10</sup>. (E), Protein levels of DR5 and DR4 in proliferating, dense or quiescent HUVECs. (F), FACS analysis of viable (Annexin V<sup>-</sup> PI<sup>-</sup>) shSCR or shTRAIL HUVECs treated with SuperKillerTRAIL (recTRAIL, at the indicated doses) for 48h (from day 3 to day 5). All graphs show mean±SEM. ns=not significant; \*p<0,05; \*\*\*p<0,001; \*\*\*\*p<0,0001.

Fig. S11

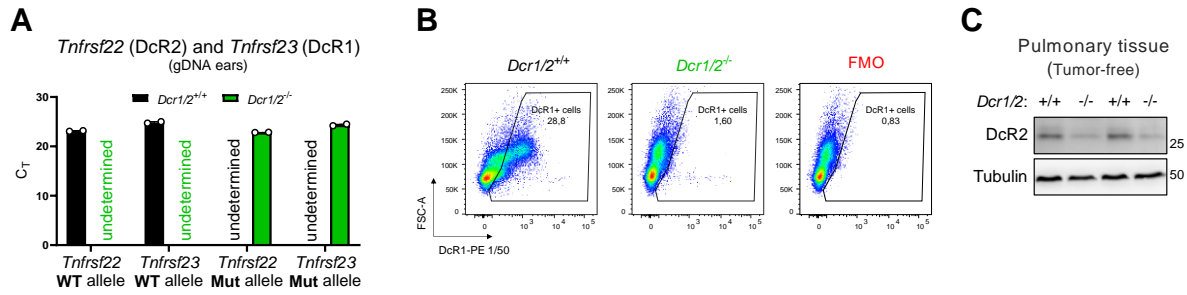

**Fig. S11. Related to Endothelial TRAIL decoy receptors (DcRs) favor metastatic spread**

(A), Allelic discrimination of wild type and mutant *Tnfrsf22* and *Tnfrsf23* allele determined by real-time PCR using specific LNA hybridization probes. The figure shows representative threshold cycle ( $C_T$ ) values from constitutive DcR1/2 WT (*Dcr1/2*<sup>+/+</sup>) and KO (*Dcr1/2*<sup>-/-</sup>) mice.

(B), FACS analysis of extracellular DcR1 protein on viable cells from *Dcr1/2*<sup>+/+</sup> and *Dcr1/2*<sup>-/-</sup> mice.

(C), Protein levels of DcR2 in whole lung tissue lysates of *Dcr1/2*<sup>+/+</sup> and *Dcr1/2*<sup>-/-</sup> mice.
